# Supplementary material
Source: publisher figshare collection journal article supplement (https://gsapubs.figshare.com/ndownloader/files/28385457)
Supplement: Supplementary file 1 [file 28385457]

## **Data repository: A new kind of invisible gold in pyrite hosted in deformation-related dislocations**

Denis Fougerouse<sup>1,2</sup>, Steven M. Reddy<sup>1,2</sup>, Mark Aylmore<sup>2</sup>, Lin Yang<sup>3</sup>, Paul Guagliardo<sup>4</sup>,  
David W. Saxey<sup>2</sup>, William D.A. Rickard<sup>2</sup>, Nicholas Timms<sup>1</sup>

<sup>1</sup>School of Earth and Planetary Sciences, Curtin University, Perth, Australia

<sup>2</sup>Geoscience Atom Probe Facility, John de Laeter Centre, Curtin University, Perth, Australia

<sup>3</sup>China University of Geosciences, Beijing, China

<sup>4</sup>Centre for Microscopy, Characterisation and Analysis, The University of Western Australia, Crawley, Australia

### **1. The Huangjindong gold deposit**

The Jiangnan Orogen, located in China between the Yangtze and Cathaysia Blocks (Deng and Wang 2016), contains total gold resources of ~ 970 t (Xu et al. 2017). The Orogen was formed by a collision between the Yangtze and the Cathaysia Blocks during the assembly of the Rodinia Supercontinent from the late Mesoproterozoic to early Neoproterozoic (Li et al., 2008; Li et al., 2009). After formation, it experienced Early Paleozoic intracontinental orogeny, Early Mesozoic folding and thrusting related to the formation of Qinling-Dabie orogeny, and Late Mesozoic formation of the Basin-and-Range-like topography caused by the subduction of the Paleo-Pacific Plate (Shu, 2006; Zhang et al., 2019).

The Huangjindong gold deposit with gold reserves of ~82 t and an average grade of 5 g/t is hosted by the Changsha-Pingjiang fault zone in the central part of the Jiangnan Orogen (Fig. 1b; Zhang et al., 2020). The host rocks in the Huangjindong deposit are Neoproterozoic slates that formed from regional lower- to midgreenschist-facies metamorphism of turbidites (Zhang et al., 2019). Due to lack of reliable minerals for dating, mineralization age of the Huangjindong gold deposit is uncertain, varying from 460 Ma to 150 Ma (Zhang et al., 2019).

Based on the mineral assemblage, fluid inclusions studies and arsenopyrite thermobarometry, the gold mineralization was estimated to have occurred at a depth of  $5 \pm 1$  km and temperature of 200–350 °C (Li et al. 2011; Liu et al. 2017).

The studied sample, D02B3 (114.049008 N, 28.675227 E), is a representative gold ore from E-W-trending, 1-m-thickness orebody (dipping 45–70° S; Zhang et al., 2020), which comprises barren white quartz, auriferous grey quartz and gold-mineralized slates. The main minerals in the sample include quartz, sericite, pyrite and arsenopyrite with minor chalcopyrite, tetrahedrite, galena and native gold (Zhang et al., 2020). Gold mainly occurs as refractory gold within arsenopyrite or pyrite in the sample.

## **2. Methods**

The electron backscattered diffraction (EBSD) analyses were performed with the TESCAN Clara field emission gun scanning electron microscope (FEG-SEM) equipped with an Oxford Instruments Symmetry EBSD detector in the John de Laeter Centre at Curtin University. The EBSD data was process with the Oxford Symmetry software. The maps are coloured using the perceptually uniform Imola colour scheme (Crameri, 2018). Within the pyrite a ~2° low-angle boundary was selected for NanoSIMS analyses.

The CAMECA NanoSIMS 50L at the Centre for Microscopy, Characterisation and Analysis at the University of Western Australia, was used in this study. Measurements were carried out with a Cs<sup>+</sup> primary beam, with a spot size of approximately 100 nm, impact energy of 16 keV, and a beam current of 0.6 pA. Secondary ion images were obtained by rastering the primary ion beam across areas measuring 50 µm<sup>2</sup>, at a resolution of 512 x 512 pixels, with a counting time of 15 ms per pixel.

The TESCAN Lyra3 Ga<sup>+</sup> focused ion beam coupled SEM (FIB-SEM) in the John de Laeter Centre at Curtin University was used to prepare atom probe needle-shaped specimens. The FIB-SEM was operated at an accelerating voltage of 30kV during the extraction and shaping of the specimen and a final cleaning routine at an accelerating voltage of 2kV was used to remove the layer affected by high-energy Ga ions.

Atom probe specimens were analysed with the CAMECA LEAP 4000X HR Geoscience Atom Probe in the John de Laeter Centre at Curtin University. The specimens were analysed in laser assisted mode with a UV laser ( $\lambda = 355$  nm), pulsed at 125 kHz and a laser pulse energy of 35 pJ. The specimen base temperature was maintained at 60 K and the automated detection rate at 0.01 atom/pulse. In the mass-to-charge ratio spectrum, peaks twice higher than the background were identified and ranged. The composition of the dislocation were calculating by extracting the composition of isoconcentration surfaces defined by 0.3 at.% Ni. The 1D concentration profiles were generated normal to the boundary through the dislocations with a step size of 1 nm. Additional details about the data acquisition and quality is given in table S1 following the recommendations of Blum et al 2018.

### 3. References

- Blum, T.B., Darling, J.R., Kelly, T.F., Larson, D.J., Moser, D.E., Perez-Huerta, A., Prosa, T.J., Reddy, S.M., Reinhard, D.A., Saxey, D.W., 2018. Best practices for reporting atom probe analysis of geological materials. *Microstructural Geochronology: Planetary Records Down to Atom Scale* 369-373.
- Crameri, F., 2018. Geodynamic diagnostics, scientific visualisation and StagLab 3.0. *Geoscientific Model Development*, 11(6), 2541-2562.
- Deng, J., Wang, Q.F., 2016. Gold mineralization in China: metallogenic provinces, deposit types and tectonic framework. *Gondwana Res.* 36, 219–274.
- Li, J., Chen, B.H., An, J.H., Tan, S.M., Zhang, X.G., Yao, Y.J., (2011). Characteristics of fluid inclusions of the Huangjindong gold deposit, Hunan Province. *Geol Miner Resour South China* 27:163–168 (in Chinese with English abstract).
- Li, X.H., Li, W.X., Li, Z.X., Lo, Q.H., Wang, J., Ye, M.F., Yang, Y.H., 2009. Amalgamation between the Yangtze and Cathaysia Blocks in South China: constraints from SHRIMP U-Pb zircon ages, geochemistry and Nd-Hf isotopes of the Shuangxiwu volcanic rocks. *Precambr. Res.* 174, 117–128.

Li, Z.X., Bogdanova, S.V., Collins, A.S., Davidson, A., De Waele, B., Ernst, R.E., Fitzsimons, I.C.W., Fuck, R.A., Gladkochub, D.P., Jacobs, J., Karlstrom, K.E., Lu, S., Natapov, L.M., Pease, V., Pisarevsky, S.A., Thrane, K., Vernikovsky, V., 2008. Assembly, configuration, and break-up history of Rodinia: a synthesis. *Precambr. Res.* 160, 179–210.

Liu, Y., Zhang, L., Sun, S.C., Qi, P., Wu, S.G., Gao, L., 2017. Mineralization mechanism of Yangshanzhuang gold deposit, northeastern Hunan Province. *Acta Petrol Sin* 33:2273–2284 (in Chinese with English abstract)

Shu, L.S., 2006. Pre-Devonian tectonic evolution of south China from Cathaysian Block to Caledonian Period folded orogenic belt. *Geol. J China Univ.* 12, 418–431 (in Chinese with English abstract).

Xu, D.R., Deng, T., Chi, G.X., Wang, Z.L., Zou, F.H., Zhang, J.L., Zou, S.H., 2017. Gold mineralization in the Jiangnan orogenic belt of south China: Geological, geochemical and geochronological characteristics, ore deposit-type and geodynamic setting. *Ore Geol. Rev.* 88, 565–618.

Zhang, L., Groves, D.I., Yang, L.Q., Sun, S.C., Weinberg, R.F., Wang, J.Y., Wu, S.G., Gao, L., Yuan, L.L., Li, R.H., 2020. Utilization of pre-existing competent and barren quartz veins as hosts to later orogenic gold ores at Huangjindong gold deposit, Jiangnan Orogen, southern China. *Mineral. Deposita* 55, 363–380.

Zhang, L., Yang, L.Q., Groves, D.I., Sun, S.C., Chen, J.H., 2019. An overview of timing and structural geometry of gold, gold-antimony and antimony mineralization in the Jiangnan Orogen, southern China. *Ore Geology Reviews*, 115, 103173.

#### 4. Figure S1

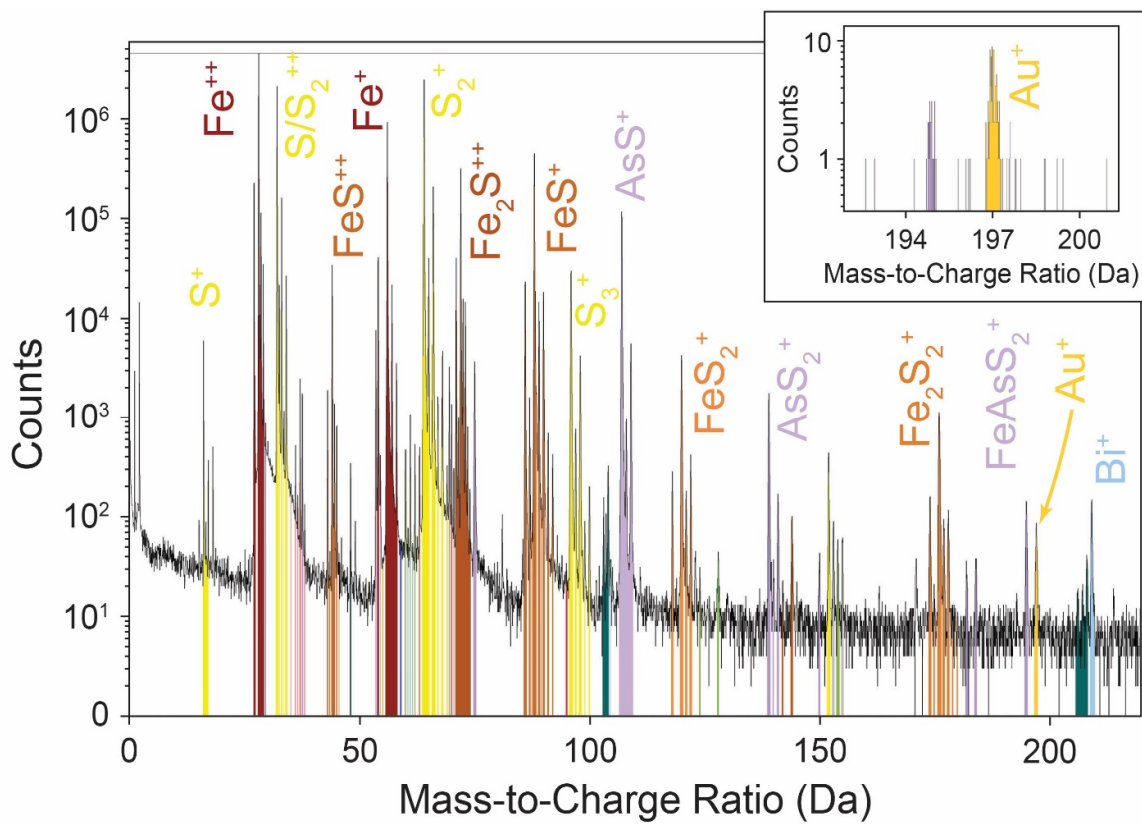

Figure S1: APT mass spectra of specimen 1. The inset is extracted from the combined dislocations as defined by an isosurface concentration of 0.3 at.% Ni.

5. Figure S2

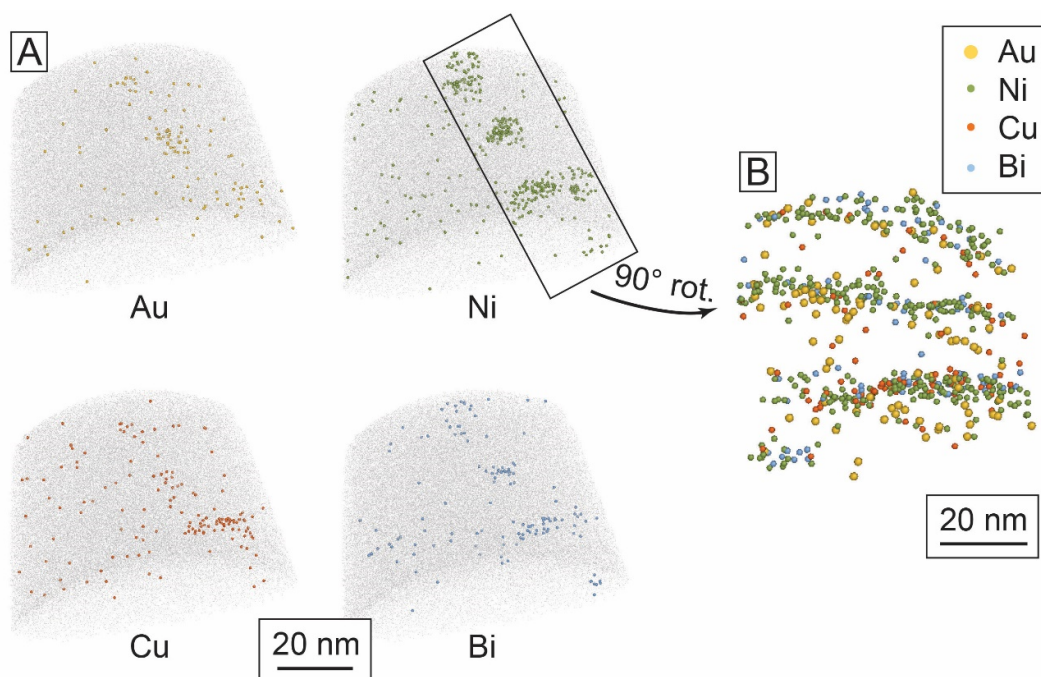

Figure S2: APT results of specimen 2. A&B) Each sphere represents an atom. The low angle boundary plane is composed of sub-horizontal gold, Ni, Cu and Bi enriched dislocations.

6. Table S1

| Specimen/Data Set                                              | Specimen 1             | Specimen 2             |
|----------------------------------------------------------------|------------------------|------------------------|
| Instrument Model                                               | LEAP 4000X<br>HR       | LEAP 4000X<br>HR       |
| <b>Instrument Settings</b>                                     |                        |                        |
| Laser Wavelength (nm)                                          | 355                    | 355                    |
| Laser Pulse Energy (pJ)                                        | 35                     | 35                     |
| Pulse Frequency (kHz)                                          | 125                    | 125                    |
| Evaporation Control                                            | Detection Rate         | Detection Rate         |
| Target Detection Rate<br>(ions/pulse)                          | 0.01                   | 0.01                   |
| Nominal Flight Path (mm)                                       | 382                    | 382                    |
| Set Point Temperature (K)                                      | 60                     | 60                     |
| Chamber Pressure (Torr)                                        | 3.20x10 <sup>-11</sup> | 3.37x10 <sup>-11</sup> |
| <b>Data Summary</b>                                            |                        |                        |
| LAS Root Version                                               | 15.41.342i             | 15.41.342i             |
| CAMECAROOT Version                                             | 18.46.492              | 18.46.492              |
| Analysis Software                                              | AP Suite 6.0           | AP Suite 6.0           |
| Total Ions:                                                    | 22,497,605             | 4,466,850              |
| <i>Single</i>                                                  | 60.53%                 | 57.28%                 |
| <i>Multiple</i>                                                | 38.97%                 | 42.05%                 |
| <i>Partial</i>                                                 | 0.50%                  | 0.67%                  |
| Reconstructed Ions:                                            | 20,072,687             | 3,946,934              |
| <i>Ranged</i>                                                  | 89.22%                 | 88.36%                 |
| <i>Unranged</i>                                                | 10.78%                 | 11.64%                 |
| Mass Calib. (peaks/interp.)                                    | 5/Lin.                 | 5/Lin.                 |
| <sup>†</sup> (M/ΔM)                                            | 725                    | 649                    |
| <sup>††</sup> (M/ΔM <sub>10</sub> )                            | 346                    | 275                    |
| time independent background<br>(ppm/ns)                        | 1.7                    | 1.8                    |
| <b>Reconstruction</b>                                          |                        |                        |
| Final specimen state                                           | Fractured              | Fractured              |
| Pre-/Post-analysis Imaging                                     | SEM/n.a.               | SEM/n.a.               |
| Radius Evolution Model                                         | “voltage”              | “voltage”              |
| Field Factor (k)                                               | 3.3                    | 3.3                    |
| Image Compression Factor                                       | 1.65                   | 1.65                   |
| Assumed E-Field (V/nm)                                         | 19                     | 19                     |
| Detector Efficiency                                            | 36%                    | 36%                    |
| Avg. Atomic Volume (nm <sup>3</sup> )                          | 0.01325                | 0.01325                |
| V <sub>initial</sub> (V)                                       | 3320                   | 3138                   |
| <sup>†</sup> ΔM is full width at half maximum.                 |                        |                        |
| <sup>††</sup> ΔM <sub>10</sub> is full width at tenth maximum. |                        |                        |

Table S1: Instrument and reconstruction parameters for APT analyses following recommendations of Blum et al. (2018).
